CORRECTION

## Correction: Perceptions of healthcare finance and system quality among Nigerian healthcare workers

Blessing Osagumwendia Josiah, Emmanuel Chukwunwike Enebeli, Brontie Albertha Duncan, Lordsfavour Uzoma Anukam, Oluwadamilare Akingbade, France Ncube, Chinelo Cleopatra Josiah, Eric Kelechi Alimele, Ndidi Louis Otoboyor, Oghosa Gabriel Josiah, Jemima Ufuoma Mukoro, Blessing Chiamaka Nganwuchu, Fawole Israel Opeyemi, Timothy Wale Olaosebikan, Marios Kantaris

In the Abstract section, there is an error in the third and 11th sentences of the paragraph. The correct third sentence is: A cross-sectional survey was conducted with 584 healthcare professionals from nine States across Nigeria, representing a variety of healthcare occupations. The correct 11th sentence is: By implementing these reforms, Nigeria can enhance the quality and accessibility of healthcare services and improve the health and well-being of its citizens and residents.

### Reference

1. Josiah BO, Enebeli EC, Duncan BA, Anukam LU, Akingbade O, Ncube F, et al. Perceptions of healthcare finance and system quality among Nigerian healthcare workers. PLOS Glob Public Health. 2024;4(11):e0003881. <https://doi.org/10.1371/journal.pgph.0003881> PMID: [39509422](https://pubmed.ncbi.nlm.nih.gov/39509422/)

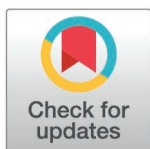

### OPEN ACCESS

**Citation:** Josiah BO, Enebeli EC, Duncan BA, Anukam LU, Akingbade O, Ncube F, et al. (2025) Correction: Perceptions of healthcare finance and system quality among Nigerian healthcare workers. PLOS Glob Public Health 5(8): e0005068. <https://doi.org/10.1371/journal.pgph.0005068>

**Published:** August 13, 2025

**Copyright:** © 2025 Josiah et al. This is an open access article distributed under the terms of the [Creative Commons Attribution License](https://creativecommons.org/licenses/by/4.0/), which permits unrestricted use, distribution, and reproduction in any medium, provided the original author and source are credited.
